# Supplementary material
Source: publisher figshare collection journal article supplement (https://acs.figshare.com/ndownloader/files/3610260)
Supplement: Supplementary file 1 [file 3610260]

# Anion Dependent Switch in C-X Reductive Elimination Diastereoselectivity

Michael J. Geier,<sup>†</sup> Marzieh Dadkhah Aseman<sup>‡</sup> and Michel R. Gagné<sup>†\*</sup>

<sup>†</sup>Caudill Laboratories, Department of Chemistry, University of North Carolina at Chapel Hill, Chapel Hill, North Carolina 27599-3290

<sup>‡</sup>Department of Chemistry, Faculty of Sciences, Shiraz University, Shiraz 71454, Iran

## Supporting Information

All air and moisture sensitive procedures were performed using an MBraun glovebox or standard Schlenk line techniques. Commercially available reagents were used without further purification. Acetonitrile was distilled from CaH<sub>2</sub>. NMR spectra were collected on a Bruker 600 MHz Avance spectrometer and referenced to residual solvent peaks. Compounds **1**,<sup>1</sup> **2**,<sup>2</sup> **4**<sup>3</sup> and **5**<sup>3</sup> have been reported. New compounds were isolated by prep tlc, using 20:1 hexanes:ethyl acetate. HRMS was performed by Dr. Mee-Kyung Chung at the University of North Carolina at Chapel Hill.

### Procedure for Oxidation Reactions

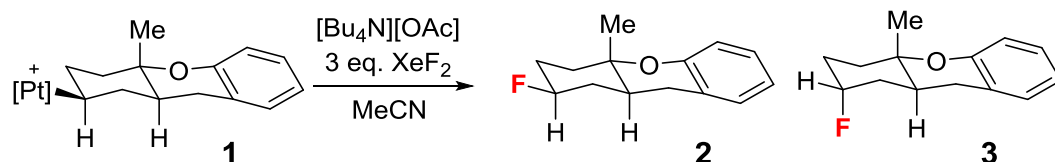

**Reactions in Table 1:** XeF<sub>2</sub> (4 mg, 0.24 mmol) was added to a stirring solution of **1** (8 mg, 0.08 mmol) and tetrabutylammonium acetate in CD<sub>3</sub>CN (0.7 mL). The reaction mixtures were immediately (<5 minutes) analyzed by NMR and yields and ratios were determined by <sup>19</sup>F NMR using 1-fluoro-3,5-dimethoxybenzene as internal standard.

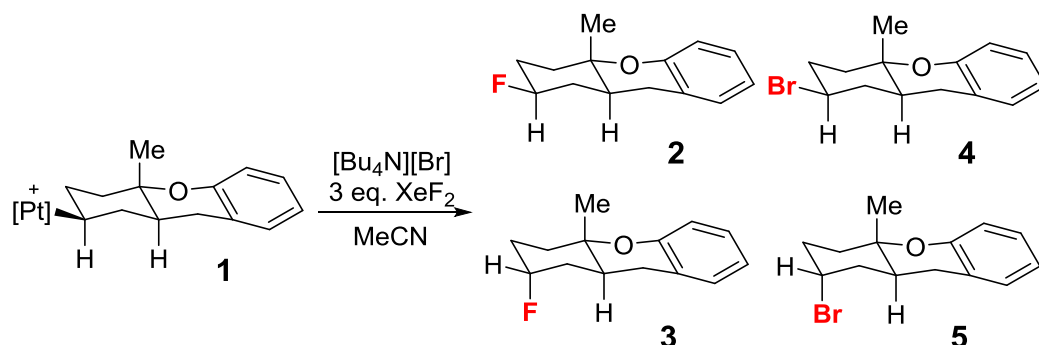

**Reactions in Table 2:** XeF<sub>2</sub> (4 mg, 0.24 mmol) was added to a stirring solution of **1** (8 mg, 0.08 mmol) and tetrabutylammonium bromide in CD<sub>3</sub>CN (0.7 mL). The reaction mixtures were immediately (<5 minutes) analyzed by NMR and yields and ratios were determined by <sup>1</sup>H NMR using 4-methylanisole as internal standard.

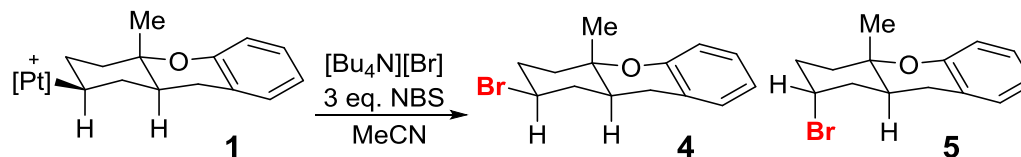

**Reactions in Table 3:** N-bromosuccinimide (4.2 mg, 0.24 mmol) was added to a stirring solution of **1** (8 mg, 0.08 mmol) and tetrabutylammonium bromide in CD<sub>3</sub>CN (0.7 mL). The reaction mixtures were immediately (<5 minutes) analyzed by NMR and yields were determined by <sup>1</sup>H NMR using 4-methylanisole as internal standard, the ratio of diastereomers was determined by integration using gcms.

### Characterization

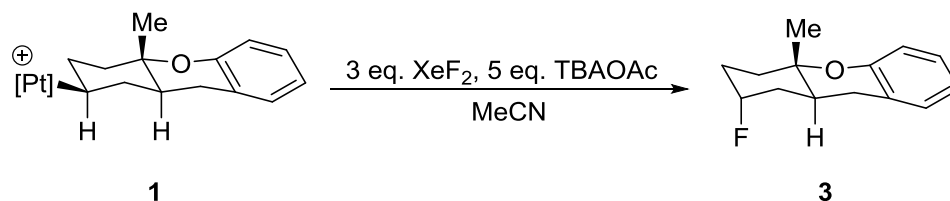

<sup>1</sup>H NMR (600 MHz, CD<sub>2</sub>Cl<sub>2</sub>): δ 7.11-7.06 (m, 2H), 6.84 (m, 1H), 6.77 (m, 1H), 4.90 (dm, 1H, *J*<sub>H-F</sub> = 48 Hz), 2.62 (dd, 1H, *J* = 16.8 Hz, 5.4 Hz), 2.47 (dd, 1H, *J* = 16.8 Hz, 13.2 Hz), 2.25 (m, 1H), 2.15 (m, 2H), 2.00 (m, 1H), 1.83-1.65 (m, 2H), 1.46-1.33 (m, 1H), 1.17 (s, 3H) ppm. <sup>13</sup>C NMR (152 MHz, CD<sub>2</sub>Cl<sub>2</sub>): δ 153.5, 129.5, 127.3, 121.9, 119.7, 117.1, 87.6 (d, *J*<sub>C-F</sub> = 168 Hz), 76.1, 34.7 (d, *J*<sub>C-F</sub> = 21.1 Hz), 33.4, 33.3, 28.5, 28.4 (d, *J*<sub>C-F</sub> = 21.1 Hz), 15.4 ppm. <sup>19</sup>F NMR (565 MHz, CD<sub>2</sub>Cl<sub>2</sub>): -182.2 ppm. HRMS (EI) C<sub>14</sub>H<sub>18</sub>FO [M + H]<sup>+</sup>/*z* calc. 221.1336 found 221.1331.

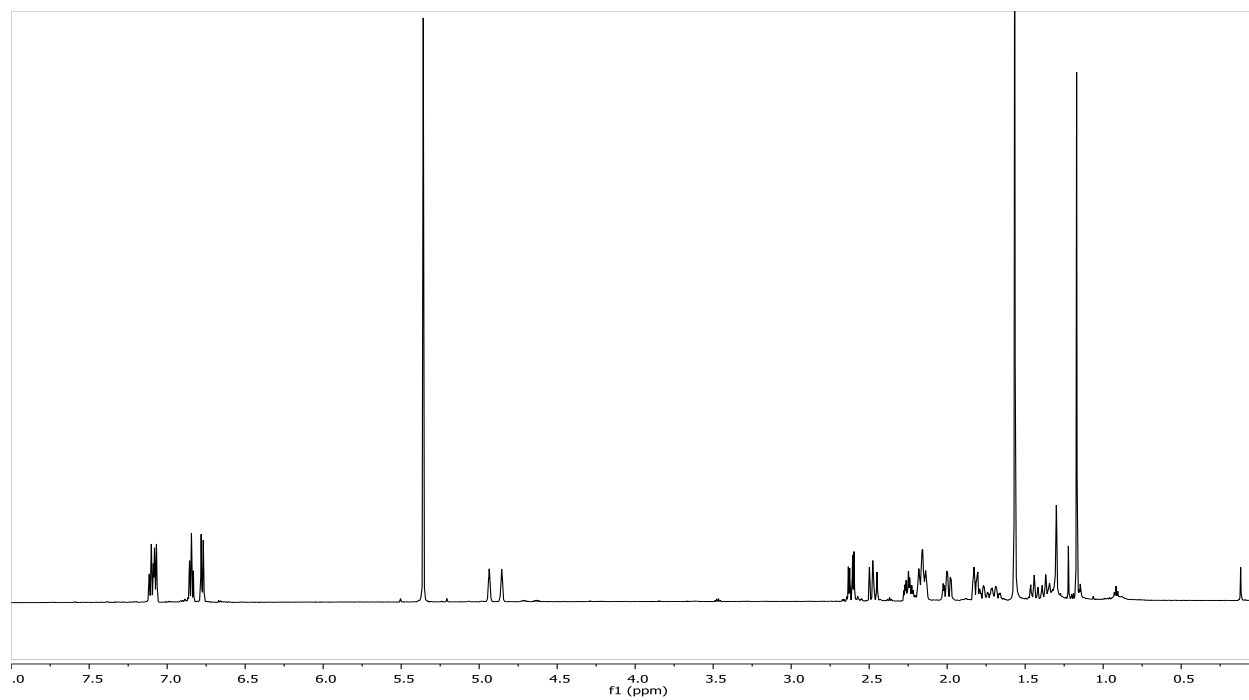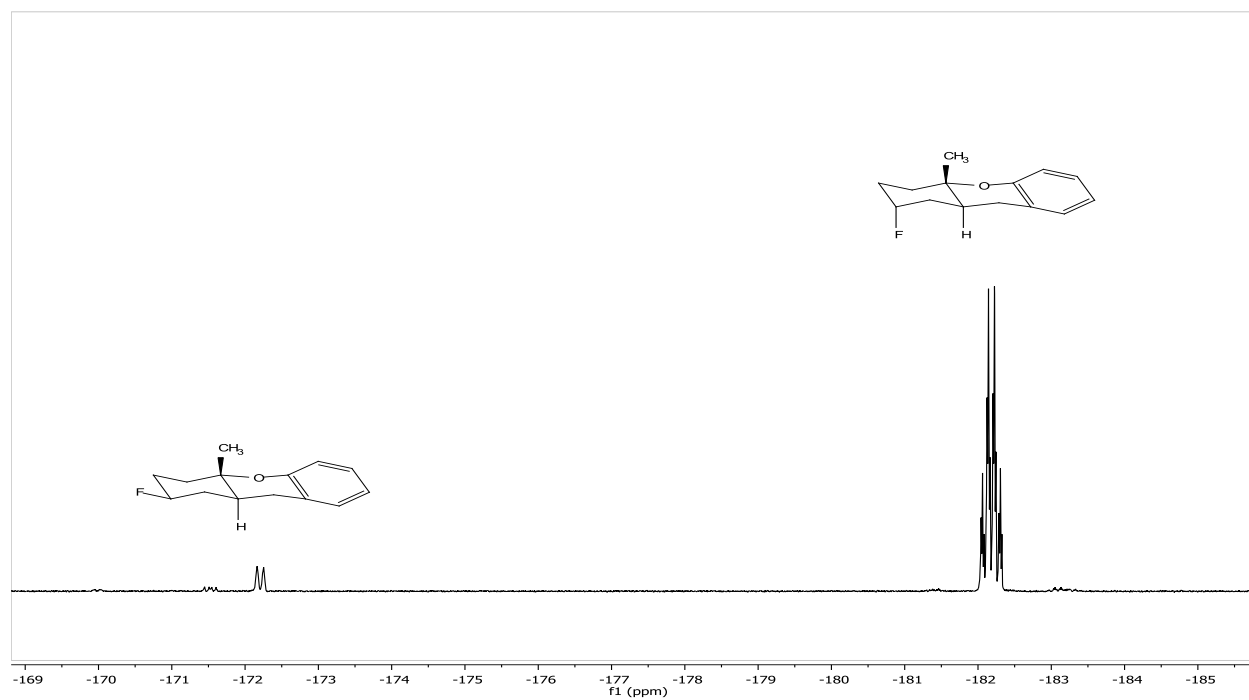

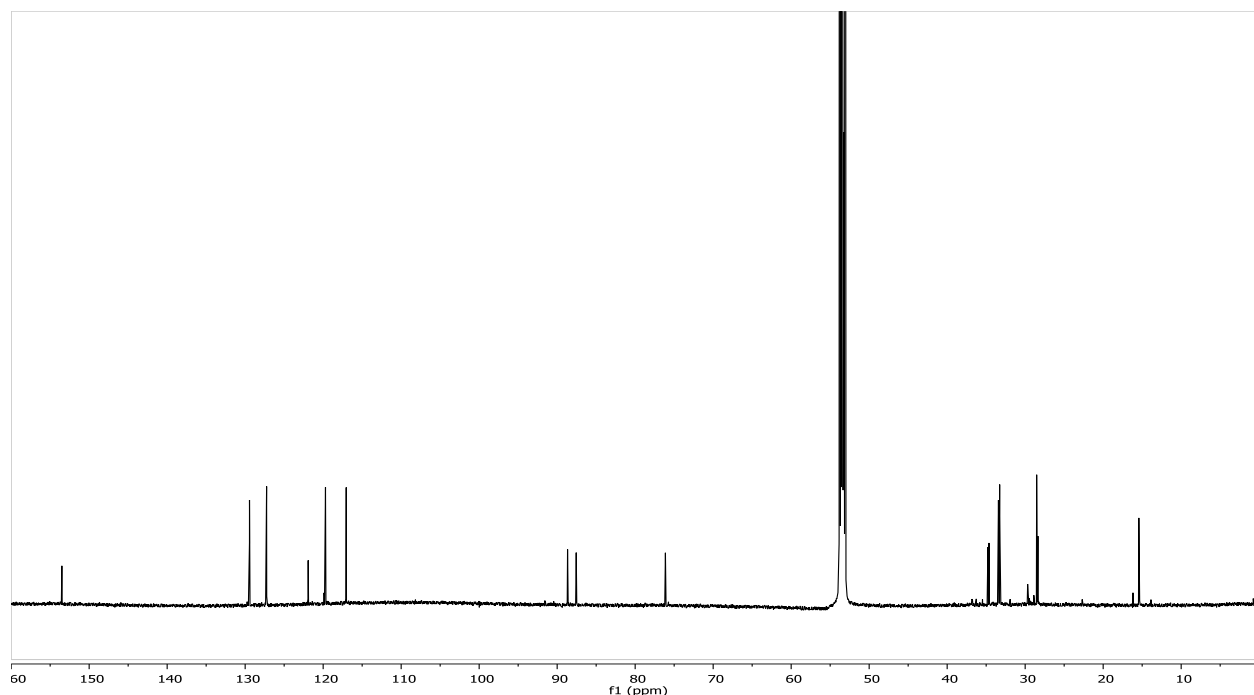

Compound from reference 19: The stereoretentive fluorinated product has been reported previously<sup>2</sup> from reaction of the Pt organometallic with XeF<sub>2</sub>. Addition of 5 equivalents of tetrabutylammonium acetate to the reaction yielded the stereoinvertive product characterized below.

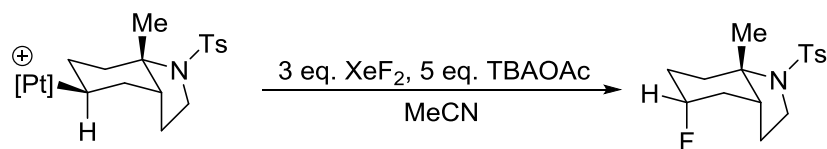

<sup>1</sup>H NMR (600 MHz, CD<sub>2</sub>Cl<sub>2</sub>): δ 7.74 (d, 2H, *J* = 7.8 Hz), 7.33 (d, 2H, *J* = 7.8 Hz), 4.82 (dm, 1H, *J*<sub>H-F</sub> = 47 Hz), 3.51 (m, 1H), 3.29 (m, 1H), 2.45 (s, 3H), 2.39 (m, 3H), 2.05 (m, 3H), 1.83 (m, 2H), 1.58 (m, 1H) 1.10 (s, 3H) ppm. <sup>13</sup>C NMR (152 MHz, CD<sub>2</sub>Cl<sub>2</sub>): δ 142.9, 138.9, 129.4, 127.0, 88.1 (d, *J*<sub>C-F</sub> = 168.7 Hz), 65.2, 46.2, 42.3, 32.9, 31.1 (d, *J*<sub>C-F</sub> = 21.3 Hz), 27.9 (d, *J*<sub>C-F</sub> = 22.8 Hz), 25.9, 21.2, 16.0 ppm. <sup>19</sup>F NMR (565MHz, CD<sub>2</sub>Cl<sub>2</sub>): - 179.0 ppm. HRMS (EI) C<sub>16</sub>H<sub>22</sub>FNO<sub>2</sub>S [M + H]<sup>+</sup>/*z* calc. 312.1428 found 312. 1325.

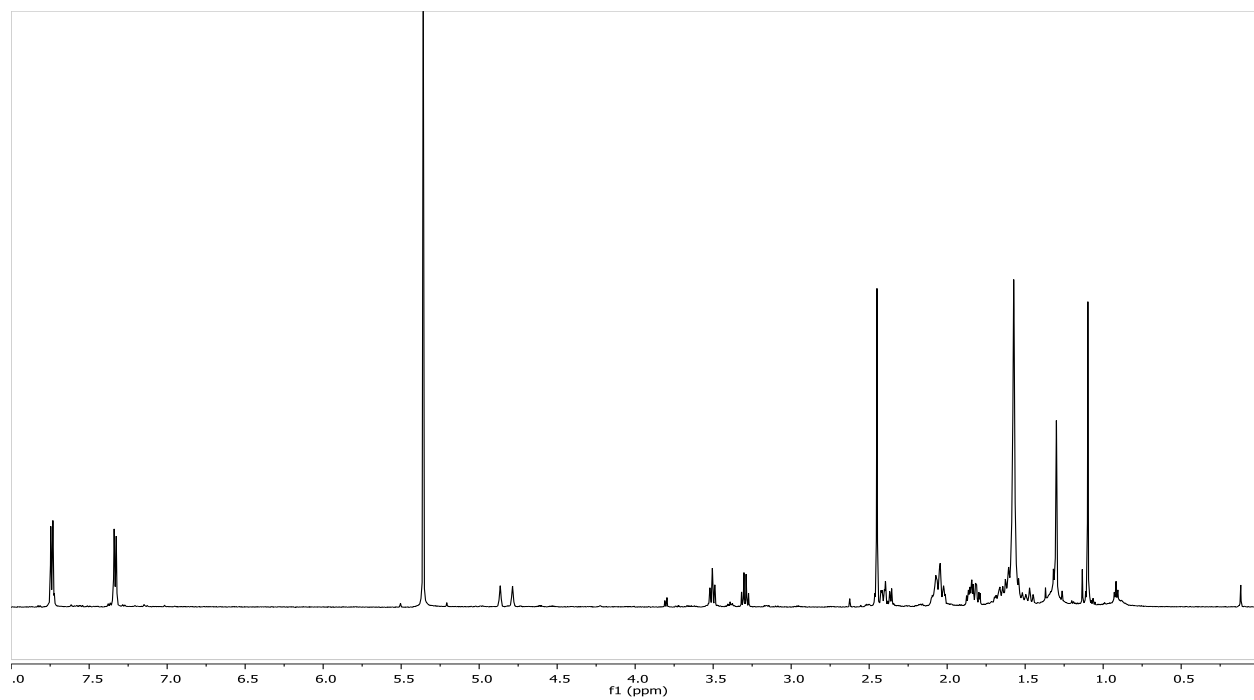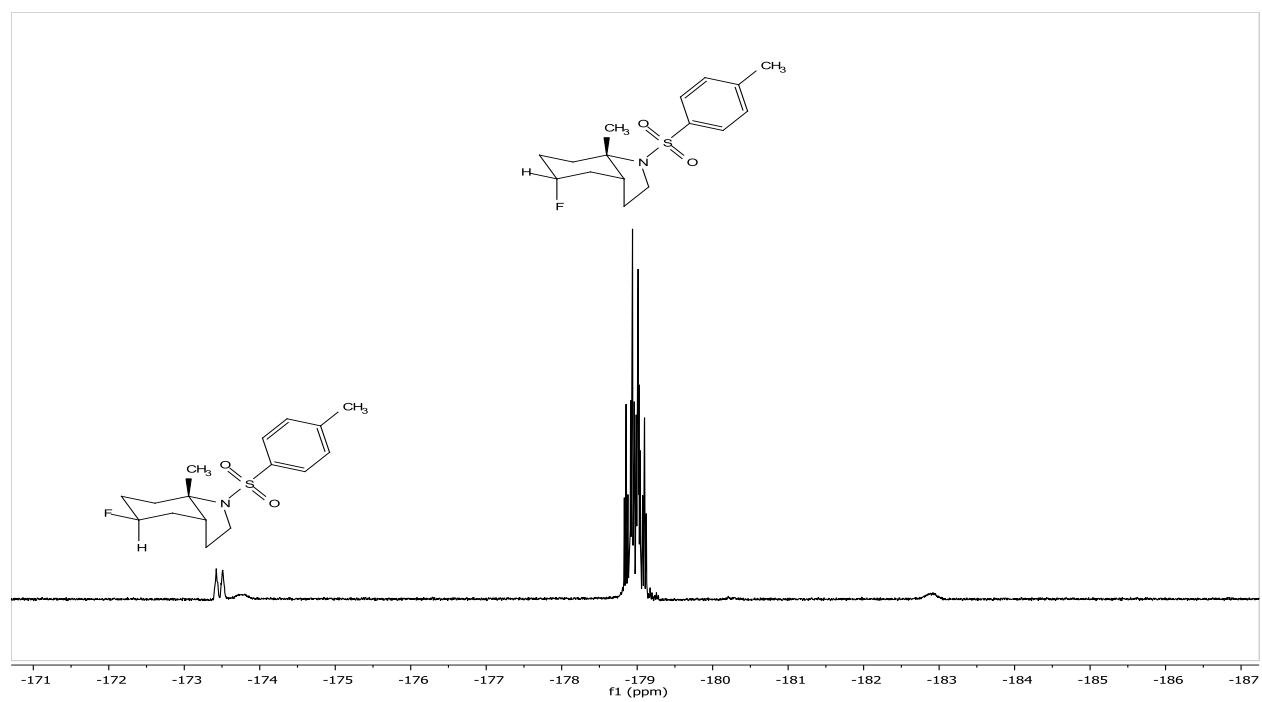

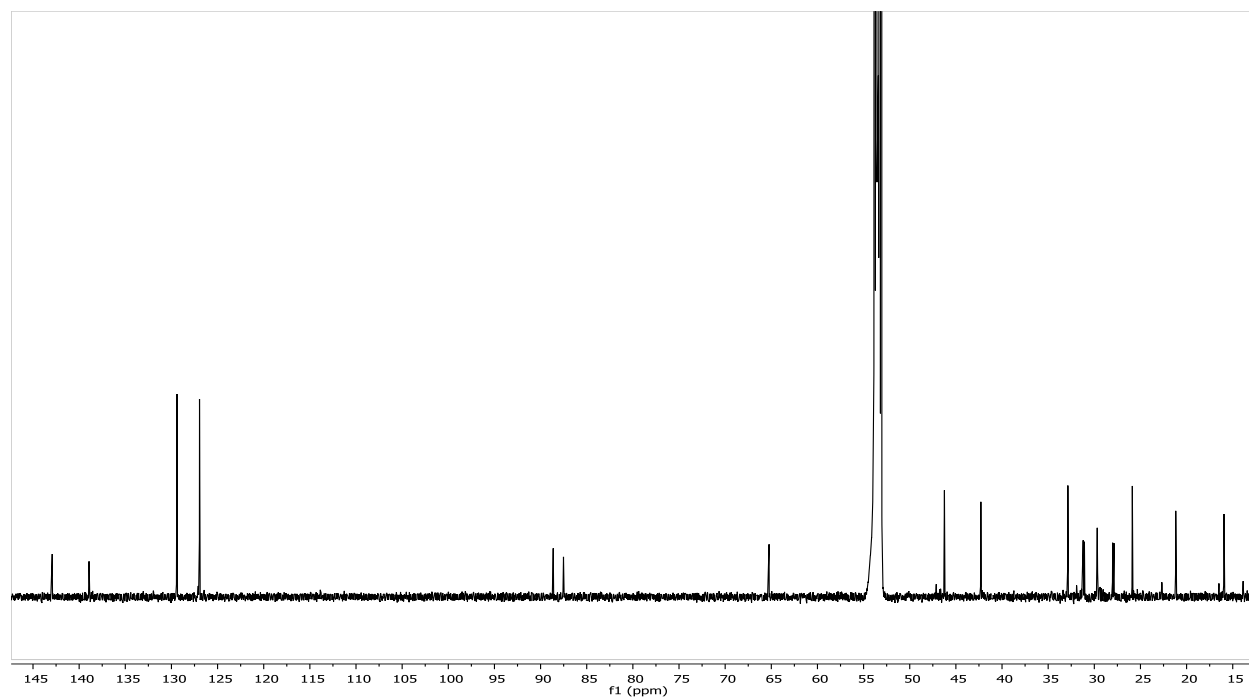

- (1) Koh, J. H.; Gagné, M. R. *Angew. Chem. Int. Ed.* **2004**, *43*, 3459.
- (2) Zhao, S.-B.; Becker, J. J.; Gagné, M. R. *Organometallics* **2011**, *30*, 3926.
- (3) Geier, M. J.; Gagné, M. R. *Organometallics* **2013**, *32*, 380.
